# Supplementary material
Source: Springer Nature journal article supplement (https://www.springermedizin.de/resource/supplementary/12889_2013_6279_MOESM2_ESM.pdf/9499142)
Supplement: MOESM2 [file 9499142]

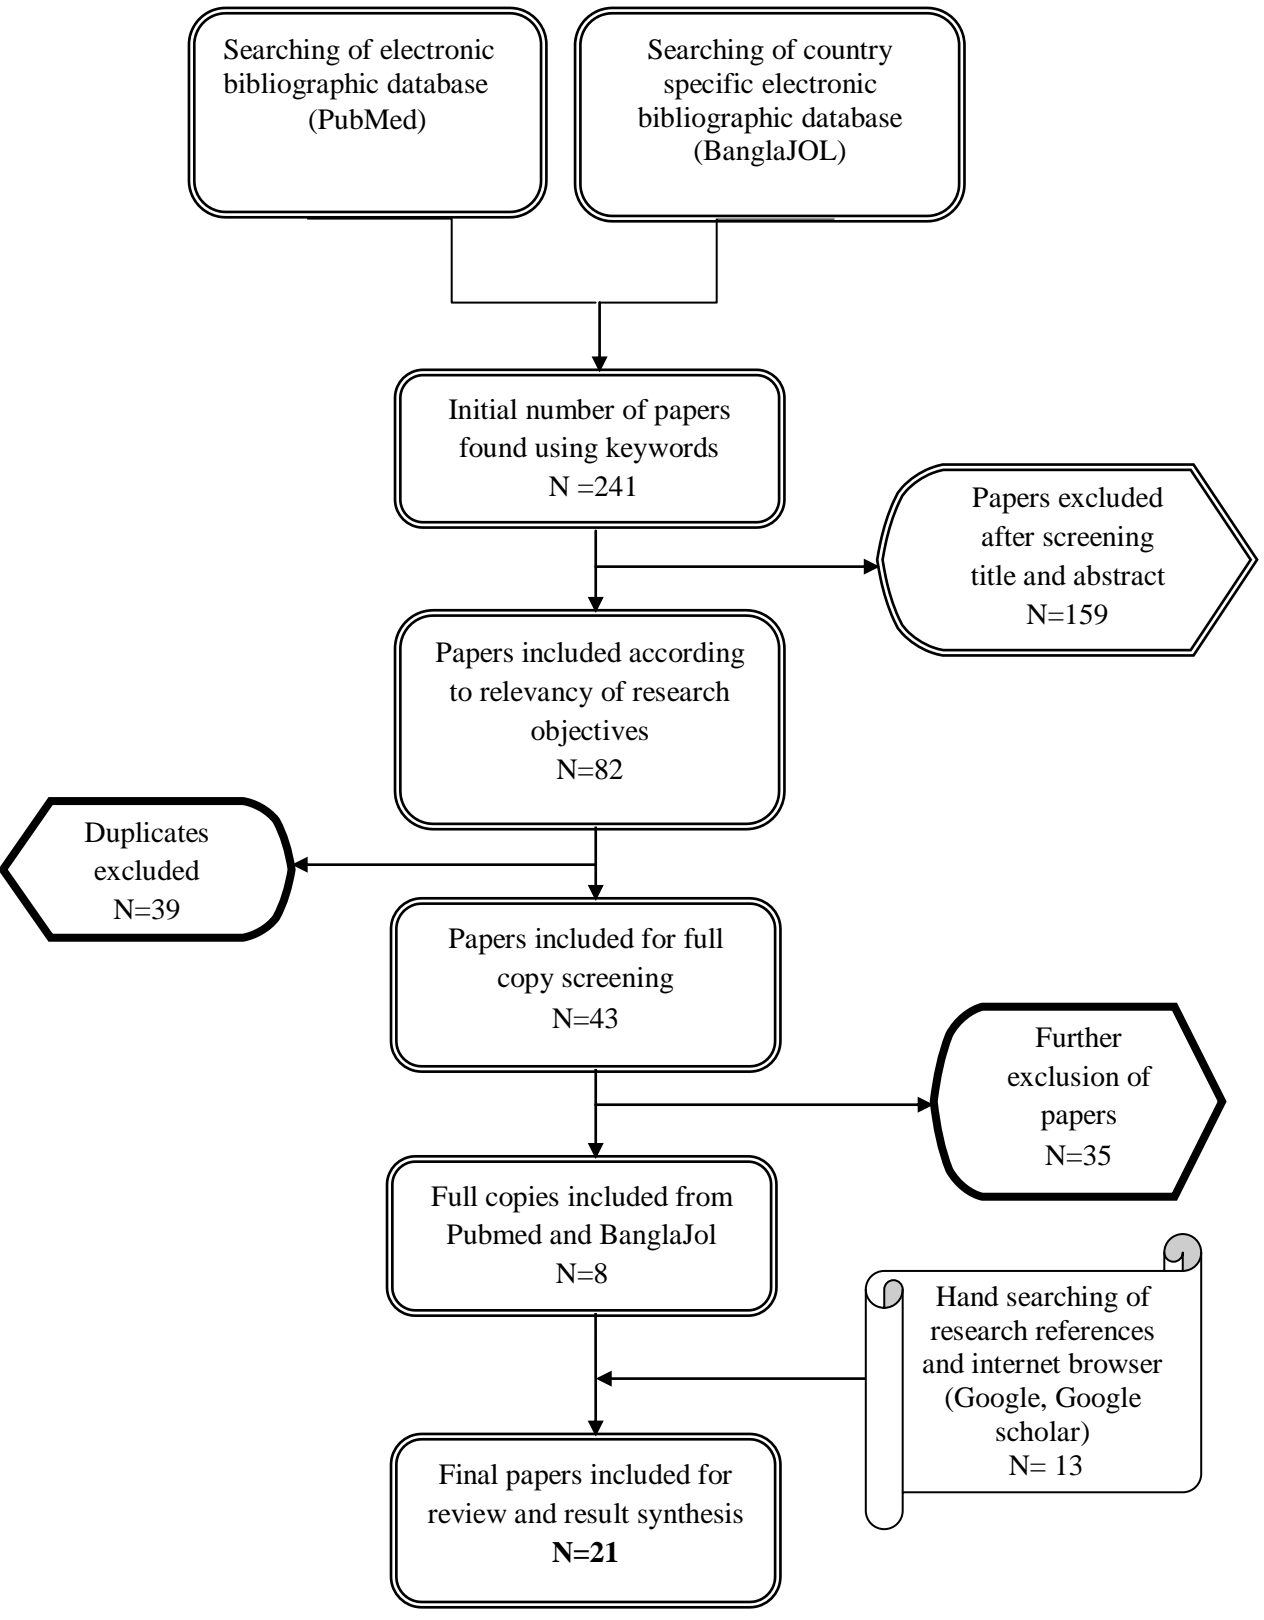

Searching of electronic  
bibliographic database  
(PubMed)

Searching of country  
specific electronic  
bibliographic database  
(BanglaJOL)

Initial number of papers  
found using keywords  
N =241

Papers excluded  
after screening  
title and abstract  
N=159

Papers included according  
to relevancy of research  
objectives  
N=82

Duplicates  
excluded  
N=39

Papers included for full  
copy screening  
N=43

Further  
exclusion of  
papers  
N=35

Full copies included from  
Pubmed and BanglaJol  
N=8

Hand searching of  
research references  
and internet browser  
(Google, Google  
scholar)  
N= 13

Final papers included for  
review and result synthesis  
N=21
